# Supplementary material
Source: PubMed Central journal article supplement (PMC3581065)
Supplement: Supp_Fig1.pdf [file Supp_Fig1.pdf]

## Supplementary Data

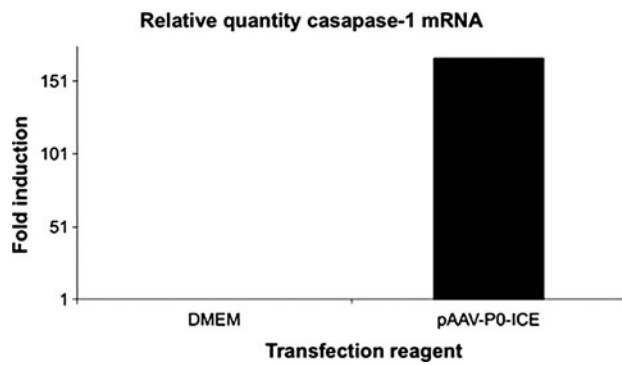

**SUPPLEMENTARY FIG. S1.** Fold induction of caspase-1 mRNA in cultured HEI-193 cells after transfection with pAAV1-P0-ICE. RNA was collected from cultured HEI-193 cells 24 hr after transfection with the pAAV1-P0-ICE plasmid or after exposure to DMEM only (negative control). After DNA digestion and RNA cleanup relative expression of caspase-1 was determined by TaqMan real-time RT-PCR, using caspase-1 primers and probe from Life Technologies (cat. no. 4331182). There was a 161-fold induction of caspase-1 mRNA in cells transfected with pAAV-P0-ICE compared with the negative control (cells exposed to medium only), thus indicating efficient expression of the plasmid transgene.
